# Supplementary material for: Catalytic dioxygenation of flavonol by MII-complexes (M = Mn, Fe, Co, Ni, Cu and Zn) – mimicking the MII-substituted quercetin 2,3-dioxygenase
Source: Royal Society of Chemistry journal article supplement (doi:10.1039/c5dt01760b), 2015-01-01
Supplement: c5dt01760b1.pdf [file c5dt01760b1.pdf]

## Supplementary material

# Catalytic Dioxygenation of Flavonol by $M^{II}$ -Complexes ( $M = Mn, Fe, Co, Ni, Cu$ and $Zn$ )----Mimicking the $M^{II}$ - Substituted Quercetin 2,3-Dioxygenase

## Table of Contents

### X-ray Structure Determinations.

#### Table Caption

**Table S1.** Summary of X-ray data collection and refinement for the complex  $[(\text{Fe}^{\text{III}}\text{L})_2(\mu\text{-O})(\mu\text{-OAc})]\text{Cl}\cdot 10\text{H}_2\text{O}$  (**2B**).

**Table S2.** Selected bond distances (Å) and bond angles (°) for the complex  $[(\text{Fe}^{\text{III}}\text{L})_2(\mu\text{-O})(\mu\text{-OAc})]\text{Cl}\cdot 10\text{H}_2\text{O}$  (**2B**).

**Table S3.** The solution FT-IR results of the complexes  $[\text{M}^{\text{II}}\text{L}(\text{OAc})]$  in ethanol.

**Table S4.** The products analysis results of the dioxygenation of flavonol catalyzed by the complexes  $[\text{M}^{\text{II}}\text{L}(\text{OAc})]$  in DMF.

**Table S5.** Kinetic data for the dioxygenation of flavonol catalyzed by the complexes  $[\text{M}^{\text{II}}\text{L}(\text{OAc})]$  and  $[(\text{Fe}^{\text{III}}\text{L})_2(\mu\text{-O})(\mu\text{-OAc})]\text{Cl}$  (**2B**) in DMF.

#### Figure Caption

**Figure S1.** ESI-MS spectrum of the complexes. Insert: The molecular peak cluster of  $[\text{M}^{\text{II}}\text{L}(\text{OAc})]\text{H}^+$  (M: Mn, Co, Ni, Cu) or  $[\text{Fe}^{\text{III}}\text{L}(\text{OAc})]^+$  (Line: experiment, column: calculated). (a)  $[\text{Mn}^{\text{II}}\text{L}(\text{OAc})]$  (**1**), (b)  $[\text{Fe}^{\text{II}}\text{L}(\text{OAc})]$  (**2**), (c)  $[\text{Co}^{\text{II}}\text{L}(\text{OAc})]$  (**3**), (d)  $[\text{Ni}^{\text{II}}\text{L}(\text{OAc})]$  (**4**), (e)  $[\text{Cu}^{\text{II}}\text{L}(\text{OAc})]$  (**5**), (f)  $[\text{Zn}^{\text{II}}\text{L}(\text{OAc})]$  (**6**).

**Figure S2.** The FT-IR spectra of the ethanol solution and solid sample of  $[\text{Ni}^{\text{II}}\text{L}(\text{OAc})]$  (**4**). (A) solvent ethanol, (B) solid sample of  $[\text{Ni}^{\text{II}}\text{L}(\text{OAc})]$ , (C) ethanol solution of  $[\text{Ni}^{\text{II}}\text{L}(\text{OAc})]$ .

**Figure S3.** The EPR spectra of  $[\text{Co}^{\text{II}}\text{L}(\text{OAc})]$  (**3**) (4 mM in 0.5 mL DMF) at 100 K. A: under  $\text{N}_2$ , B: in the presence of 1 eq. flaH under  $\text{N}_2$ .

**Figure S4.** Cyclic voltammograms of (a)  $[\text{Fe}^{\text{II}}\text{L}(\text{OAc})]$  (**2**), (b)  $[\text{Co}^{\text{II}}\text{L}(\text{OAc})]$  (**3**), (c)  $[\text{Cu}^{\text{II}}\text{L}(\text{OAc})]$  (**5**) and flavonol in the presence of 1 eq. (d)  $[\text{Mn}^{\text{II}}\text{L}(\text{OAc})]$  (**1**), (e)  $[\text{Co}^{\text{II}}\text{L}(\text{OAc})]$  (**3**), (f)  $[\text{Ni}^{\text{II}}\text{L}(\text{OAc})]$  (**4**), (g)  $[\text{Cu}^{\text{II}}\text{L}(\text{OAc})]$  (**5**) and (h)  $[\text{Zn}^{\text{II}}\text{L}(\text{OAc})]$  (**6**) in DMF.

**Figure S5.** The HPLC-MS spectra of the reaction products of dioxygenation of flavonol catalyzed by  $[\text{Co}^{\text{II}}\text{L}(\text{OAc})]$  (**3**) at 70 °C for 12 hrs. (a) HPLC spectra. MS spectra of (b) HObs  $m/z$  (pos.): 260.1 ( $\text{M} + \text{NH}_4$ )<sup>+</sup>, (c) benzoic acid  $m/z$  (neg.): 121.3 ( $\text{M} - \text{H}$ )<sup>-</sup>, 181.1 ( $\text{M} + \text{CH}_3\text{COO}$ )<sup>-</sup>, (d) salicylic acid  $m/z$  (neg.): 137.2 ( $\text{M} - \text{H}$ )<sup>-</sup>, (e) *N,N*-dimethylbenzamide  $m/z$  (pos.): 150.2 ( $\text{M} + \text{H}$ )<sup>+</sup> and (f) 2-hydroxy-*N,N*-dimethylbenzamide  $m/z$  (pos.): 166.2 ( $\text{M} + \text{H}$ )<sup>+</sup>.

**Figure S6.** Detection of the production of CO during dioxygenation reaction of flavonol catalyzed by  $[\text{Co}^{\text{II}}\text{L}(\text{OAc})]$  (**3**) at 70 °C. (a) Plot of the CO concentration vs. reaction time. (b) Plot of the integrated CO concentration vs. reaction time.

**Figure S7.** <sup>1</sup>H NMR spectra of two main products of reaction of flavonol ( $2.5 \times 10^{-2}$  M in 200 mL DMF) with  $\text{O}_2$  catalyzed by  $[\text{Co}^{\text{II}}\text{L}(\text{OAc})]$  (**3**) (5% mol) at 100 °C for 7 days after esterification by  $\text{CH}_3\text{OH}$  in the presence of  $\text{H}_2\text{SO}_4$  at ambient temperature. (a) salicylic acid methyl ester (b) benzoic acid methyl ester.

**Figure S8.** Eyring plot for the dioxygenation of flavonol catalyzed by the complexes  $[\text{M}^{\text{II}}\text{L}(\text{OAc})]$  in DMF.

**Figure S9.** Spectral changes accompanying the titration of the complex (a) **2B**, (c) **1**, (d) **2**, (e) **3**, (f) **4**, (g) **5** and (h) **6**

( $1.0 \times 10^{-4}$  M except **2B**  $0.5 \times 10^{-4}$  M) by flavonol under  $N_2$ . Inset: Absorbance changes at  $\lambda_{\max}$  vs. eq. of flaH, (b) ESI-MS spectrum of the titration solution of **2B**.

**Figure S10.** The UV-vis spectra of the complexes  $[M^{II}L(OAc)]$  (0.1 mM) (red) and in the presence of equivalent amount of flavonol (black) (a)  $[Mn^{II}L(OAc)]$  (**1**), (b)  $[Fe^{II}L(OAc)]$  (**2**), (c)  $[Co^{II}L(OAc)]$  (**3**), (d)  $[Ni^{II}L(OAc)]$  (**4**), (e)  $[Cu^{II}L(OAc)]$  (**5**), (f)  $[Zn^{II}L(OAc)]$  (**6**) (g) ESI-MS spectrum of the solution of  $[Co^{II}L(OAc)] + 1$  eq. flaH after exposure to  $O_2$ . Inset: The peak cluster of  $[M^{II}L(flac)]H^+$  (M: Mn, Ni, Cu) or  $[M^{III}L(flac)]^+$  (M: Fe, Co) (Line: experiment, column: calculated).

## X-ray Structure Determinations

Intensity data were measured at 293(2) K on a Bruker SMART APEX II CCD area detector system. Data reduction and unit cell refinement were performed with Smart-CCD software [1]. The structures were solved by direct methods using SHELXS-97 and were refined by full-matrix least squares methods using SHELXL-97. [2]

For **2A**, all non-hydrogen atoms were refined anisotropically. The hydrogen atoms related to carbon atoms were generated geometrically. Since the disordered H<sub>2</sub>O solvent molecules could not be unambiguously modeled, the Platon Squeeze option was utilized to process the data.[3] Squeeze indicates 2 solvent regions in the cell corresponding to about 94 electrons/cell or approximately 4.5 H<sub>2</sub>O molecules per formula.

For **2B**, all non-hydrogen atoms were refined anisotropically. The hydrogen atoms related to carbon atoms were generated geometrically. “DELU” limits were used for two C atoms from the ligands. Since the disordered H<sub>2</sub>O solvent molecules could not be unambiguously modeled, the Platon Squeeze option was utilized to process the data.[3] Squeeze indicates 8 solvent regions in the cell corresponding to about 788 electrons/cell or approximately 10 H<sub>2</sub>O molecules per formula.

For **3A**, all non-hydrogen atoms were refined anisotropically. The hydrogen atoms related to carbon atoms were generated geometrically. Since the disordered H<sub>2</sub>O solvent molecules could not be unambiguously modeled, the Platon Squeeze option was utilized to process the data.[3] Squeeze indicates 2 solvent regions in the cell corresponding to about 84 electrons/cell or approximately 4 H<sub>2</sub>O molecules per formula.

For **4A**, all non-hydrogen atoms were refined anisotropically. The hydrogen atoms related to carbon atoms were generated geometrically. The hydrogen atom attached to coordinated MeOH was located from the difference Fourier map and refined with restrained O-H distance. Since the disordered H<sub>2</sub>O solvent molecules could not be unambiguously modeled, the Platon Squeeze option was utilized to process the data.[3] Squeeze indicates 4 solvent regions in the cell corresponding to about 68 electrons/cell or approximately 3.5 H<sub>2</sub>O molecules per formula.

For **5**, all non-hydrogen atoms were refined anisotropically. The hydrogen atoms related to carbon atoms were generated geometrically. All hydrogen atoms attached to oxygen atoms were located from the difference Fourier map and refined with restrained O-H and H···H distances.

## Reference:

[1] *XSCANS* (Version 2.1), Siemens Analytical X-Ray Instruments Inc., Madison, WI, **1994**.

[2] G. M. Sheldrick, *SHELXL-97, Program for X-ray Crystal Structure Refinement*, University of Göttingen: Göttingen, (Germany), **1997**.

[3] SQUEEZE (handling of disordered solvents in structure refinement). A. L. Spek. *J. Appl. Crystallogr.* 2003, **36**, 7.

**Table S1.** Summary of X-ray data collection and refinement for the complex [(Fe<sup>III</sup>L)<sub>2</sub>(μ-O)(μ-OAc)]Cl·10H<sub>2</sub>O (**2B**).

|                                           |                                                                                 |                                                                                         |                    |
|-------------------------------------------|---------------------------------------------------------------------------------|-----------------------------------------------------------------------------------------|--------------------|
| empirical formula                         | C <sub>44</sub> H <sub>43</sub> ClFe <sub>2</sub> N <sub>6</sub> O <sub>9</sub> | crystal habit                                                                           | block              |
| <i>M<sub>r</sub></i>                      | 946.99                                                                          | Crystal color                                                                           | brown              |
| crystal system                            | tetragonal                                                                      | crystal size (mm <sup>3</sup> )                                                         | 0.20 × 0.15 × 0.10 |
| space group                               | <i>I4(1)cd</i>                                                                  | <i>μ</i> /mm <sup>-1</sup>                                                              | 0.684              |
| <i>a</i> /Å                               | 16.545(5)                                                                       | 2 <i>θ</i> <sub>max</sub> /deg                                                          | 50.00              |
| <i>b</i> /Å                               | 16.545(5)                                                                       | completeness to <i>θ</i> (%)                                                            | 99.6               |
| <i>c</i> /Å                               | 36.72(2)                                                                        | reflections collected                                                                   | 26254              |
| <i>α</i> /deg                             | 90                                                                              | independent reflections                                                                 | 4245               |
| <i>β</i> /deg                             | 90                                                                              | <i>R</i> <sub>int</sub>                                                                 | 0.0733             |
| <i>γ</i> /deg                             | 90                                                                              | <i>R</i> 1 <sup>a</sup> / <i>wR</i> 2 <sup>b</sup> [ <i>I</i> >2 <i>σ</i> ( <i>I</i> )] | 0.0757/0.1976      |
| <i>V</i> /Å <sup>3</sup>                  | 10052(8)                                                                        | <i>R</i> 1 <sup>a</sup> / <i>wR</i> 2 <sup>b</sup> (all data)                           | 0.1036/0.2150      |
| <i>Z</i>                                  | 8                                                                               | goodness-of-fit ( <i>F</i> <sup>2</sup> )                                               | 0.995              |
| <i>D<sub>x</sub></i> / g cm <sup>-3</sup> | 1.251                                                                           |                                                                                         |                    |
| <i>T</i> /K                               | 296(2)                                                                          |                                                                                         |                    |

<sup>a</sup>  $R1 = \sum || F_o| - |F_c|| / \sum |F_o|$ . <sup>b</sup>  $wR2 = [\sum w (F_o^2 - F_c^2)^2 / \sum w(F_o^2)^2]^{1/2}$

**Table S2.** Selected bond distances (Å) and bond angles (°) for the complex [(Fe<sup>III</sup>L)<sub>2</sub>(μ-O)(μ-OAc)]Cl·10H<sub>2</sub>O (**2B**).

| bond distances (Å) |          | bond angles (°) |            |
|--------------------|----------|-----------------|------------|
| Fe-N(1)            | 2.303(6) | O(1)-Fe-O(5)    | 103.12(16) |
| Fe-N(2)            | 2.122(8) | O(1)-Fe-O(4)    | 94.6(2)    |
| Fe-N(3)            | 2.177(6) | O(1)-Fe-N(1)    | 87.2(2)    |
| Fe-O(1)            | 1.985(5) | O(1)-Fe-N(2)    | 87.3(3)    |
| Fe-O(4)            | 2.039(7) | O(1)-Fe-N(3)    | 159.9(2)   |
| Fe-O(5)            | 1.804(3) | O(5)-Fe-N(1)    | 167.81(18) |
|                    |          | O(5)-Fe-N(2)    | 96.8(3)    |
|                    |          | O(5)-Fe-N(3)    | 96.94(18)  |
|                    |          | O(5)-Fe-O(4)    | 98.5(3)    |
|                    |          | O(4)-Fe-N(1)    | 87.0(2)    |
|                    |          | O(4)-Fe-N(2)    | 163.7(3)   |
|                    |          | O(4)-Fe-N(3)    | 83.9(3)    |
|                    |          | N(1)-Fe-N(2)    | 76.9(3)    |
|                    |          | N(1)-Fe-N(3)    | 72.7(2)    |
|                    |          | N(2)-Fe-N(3)    | 88.8(3)    |

**Table S3.** The solution FT-IR results of the complexes [M<sup>II</sup>L(OAc)] in ethanol.

|                                                    | [Mn <sup>II</sup> L(OAc)] | [Fe <sup>II</sup> L(OAc)] | [Co <sup>II</sup> L(OAc)] | [Ni <sup>II</sup> L(OAc)] | [Cu <sup>II</sup> L(OAc)] | [Zn <sup>II</sup> L(OAc)] |
|----------------------------------------------------|---------------------------|---------------------------|---------------------------|---------------------------|---------------------------|---------------------------|
|                                                    | (1)                       | (2)                       | (3)                       | (4)                       | (5)                       | (6)                       |
| COO <sup>-</sup> of L <sup>-</sup> :               |                           |                           |                           |                           |                           |                           |
| $\nu_{\text{as}}(\text{CO}_2)$ (cm <sup>-1</sup> ) | 1594                      | 1594                      | 1600                      | 1605                      | 1609                      | 1605                      |
| $\nu_{\text{s}}(\text{CO}_2)$ (cm <sup>-1</sup> )  | 1413                      | 1394                      | 1405                      | 1417                      | 1409                      | 1391                      |
| $\Delta\nu$ (cm <sup>-1</sup> )                    | 181                       | 200                       | 195                       | 188                       | 200                       | 214                       |
| OAc <sup>-</sup> :                                 |                           |                           |                           |                           |                           |                           |
| $\nu_{\text{as}}(\text{CO}_2)$ (cm <sup>-1</sup> ) | 1557                      | 1557                      | 1549                      | 1558                      | 1576                      | 1583                      |
| $\nu_{\text{s}}(\text{CO}_2)$ (cm <sup>-1</sup> )  | 1413                      | 1413                      | 1402                      | 1402                      | 1379                      | 1440                      |
| $\Delta\nu$ (cm <sup>-1</sup> )                    | 144                       | 144                       | 147                       | 156                       | 197                       | 143                       |

**Table S4.** The products analysis results of the dioxygenation of flavonol catalyzed by the complexes [M<sup>II</sup>L(OAc)] (5 mol %) in DMF for 12 hrs.

| Catalyst                               | T<br>(°C) | HObs | Yield (%)       |                   |                                   |                                                  | Conv<br>(%) | TON  | Conv.<br>rate<br>(h <sup>-1</sup> ) |
|----------------------------------------|-----------|------|-----------------|-------------------|-----------------------------------|--------------------------------------------------|-------------|------|-------------------------------------|
|                                        |           |      | Benzoic<br>acid | Salicylic<br>acid | <i>N,N</i> -dimethyl<br>benzamide | 2-Hydroxy- <i>N,N</i> -<br>dimethyl<br>benzamide |             |      |                                     |
| [Mn <sup>II</sup> L(OAc)] ( <b>1</b> ) | 100       |      | 82.4            | 81.3              |                                   |                                                  | 82.4        | 16.5 | 1.37                                |
| [Fe <sup>II</sup> L(OAc)] ( <b>2</b> ) | 70        |      | 67.2            | 56.0              |                                   | 8.4                                              | 67.2        | 13.4 | 1.12                                |
| [Co <sup>II</sup> L(OAc)] ( <b>3</b> ) | 70        | 27.2 | 25.4            | 55.1              | 23.4                              |                                                  | 82.3        | 16.5 | 1.37                                |
| [Ni <sup>II</sup> L(OAc)] ( <b>4</b> ) | 70        | 13.5 | 30.5            | 55.7              | 36.8                              | 7.5                                              | 80.8        | 16.2 | 1.35                                |
| [Cu <sup>II</sup> L(OAc)] ( <b>5</b> ) | 100       |      | 80.5            | 78.2              |                                   |                                                  | 80.5        | 16.1 | 1.34                                |
| [Zn <sup>II</sup> L(OAc)] ( <b>6</b> ) | 100       | 16.7 | 48.8            | 65.4              | 16.7                              | 9.40                                             | 91.5        | 18.3 | 1.50                                |



**Table S5.** Kinetic data for the dioxygenation of flavonol catalyzed by the complexes  $[\text{M}^{\text{II}}\text{L}(\text{OAc})]$  and  $[(\text{Fe}^{\text{III}}\text{L})_2(\mu\text{-O})(\mu\text{-OAc})]\text{Cl}$  (**2B**) in DMF.

| <b><math>[\text{Mn}^{\text{II}}\text{L}(\text{OAc})]</math> (1)</b> |        |                                 |                                  |                                                                |                                             |                                    |                                    |
|---------------------------------------------------------------------|--------|---------------------------------|----------------------------------|----------------------------------------------------------------|---------------------------------------------|------------------------------------|------------------------------------|
| Exp. No.                                                            | T (°C) | $[\text{O}_2]_0$ ( $10^{-3}$ M) | $[\text{flaH}]_0$ ( $10^{-4}$ M) | $[\text{Mn}^{\text{II}}\text{L}(\text{OAc})]_0$ ( $10^{-6}$ M) | $\nu_{\text{in}}$ ( $10^{-8}$ M s $^{-1}$ ) | $k$ ( $10^4$ M $^{-2}$ s $^{-1}$ ) | $k$ ( $10^4$ M $^{-2}$ s $^{-1}$ ) |
| 1                                                                   | 100    | 3.18                            | 1.02                             | 1.00                                                           | 0.58                                        | $1.79 \pm 0.07$                    |                                    |
| 2                                                                   | 100    | 3.18                            | 0.99                             | 2.00                                                           | 1.00                                        | $1.59 \pm 0.05$                    |                                    |
| 3                                                                   | 100    | 3.18                            | 0.97                             | 3.00                                                           | 1.45                                        | $1.57 \pm 0.04$                    |                                    |
| 4                                                                   | 100    | 3.18                            | 1.00                             | 4.00                                                           | 2.04                                        | $1.60 \pm 0.06$                    |                                    |
|                                                                     |        |                                 |                                  |                                                                |                                             |                                    | $1.65 \pm 0.12$                    |
| 5                                                                   | 100    | 3.96                            | 1.00                             | 3.00                                                           | 1.91                                        | $1.61 \pm 0.05$                    |                                    |
| 6                                                                   | 100    | 4.75                            | 1.00                             | 3.00                                                           | 2.37                                        | $1.66 \pm 0.03$                    |                                    |
| 7                                                                   | 100    | 3.18                            | 0.79                             | 3.00                                                           | 1.22                                        | $1.62 \pm 0.09$                    |                                    |
| 8                                                                   | 100    | 3.18                            | 1.32                             | 3.00                                                           | 2.19                                        | $1.74 \pm 0.07$                    |                                    |
| 9                                                                   | 85     | 3.63                            | 0.99                             | 1.00                                                           | 0.33                                        | $0.92 \pm 0.05$                    |                                    |
| 10                                                                  | 90     | 3.49                            | 1.01                             | 1.00                                                           | 0.39                                        | $1.11 \pm 0.07$                    |                                    |
| 11                                                                  | 95     | 3.33                            | 1.00                             | 1.00                                                           | 0.47                                        | $1.41 \pm 0.04$                    |                                    |

| <b><math>[\text{Fe}^{\text{II}}\text{L}(\text{OAc})]</math> (2)</b> |        |                                 |                                  |                                                                |                                             |                                    |                                    |
|---------------------------------------------------------------------|--------|---------------------------------|----------------------------------|----------------------------------------------------------------|---------------------------------------------|------------------------------------|------------------------------------|
| Exp. No.                                                            | T (°C) | $[\text{O}_2]_0$ ( $10^{-3}$ M) | $[\text{flaH}]_0$ ( $10^{-4}$ M) | $[\text{Fe}^{\text{II}}\text{L}(\text{OAc})]_0$ ( $10^{-6}$ M) | $\nu_{\text{in}}$ ( $10^{-8}$ M s $^{-1}$ ) | $k$ ( $10^4$ M $^{-2}$ s $^{-1}$ ) | $k$ ( $10^4$ M $^{-2}$ s $^{-1}$ ) |
| 1                                                                   | 70     | 4.02                            | 0.89                             | 1.00                                                           | 0.21                                        | $0.58 \pm 0.10$                    |                                    |
| 2                                                                   | 70     | 4.02                            | 0.89                             | 2.00                                                           | 0.40                                        | $0.55 \pm 0.08$                    |                                    |
| 3                                                                   | 70     | 4.02                            | 0.91                             | 3.00                                                           | 0.62                                        | $0.56 \pm 0.07$                    |                                    |
| 4                                                                   | 70     | 4.02                            | 0.89                             | 4.00                                                           | 0.80                                        | $0.56 \pm 0.04$                    |                                    |
|                                                                     |        |                                 |                                  |                                                                |                                             |                                    | $0.55 \pm 0.02$                    |
| 5                                                                   | 70     | 4.87                            | 0.90                             | 3.00                                                           | 0.72                                        | $0.55 \pm 0.08$                    |                                    |
| 6                                                                   | 70     | 5.72                            | 0.89                             | 3.00                                                           | 0.81                                        | $0.53 \pm 0.04$                    |                                    |
| 7                                                                   | 70     | 4.02                            | 0.65                             | 3.00                                                           | 0.45                                        | $0.57 \pm 0.05$                    |                                    |
| 8                                                                   | 70     | 4.02                            | 1.10                             | 3.00                                                           | 0.69                                        | $0.52 \pm 0.05$                    |                                    |
| 9                                                                   | 75     | 3.90                            | 0.87                             | 3.00                                                           | 0.84                                        | $0.83 \pm 0.06$                    |                                    |
| 10                                                                  | 90     | 3.49                            | 0.87                             | 3.00                                                           | 1.13                                        | $1.24 \pm 0.05$                    |                                    |
| 11                                                                  | 95     | 3.33                            | 0.89                             | 3.00                                                           | 1.42                                        | $1.60 \pm 0.04$                    |                                    |

**[Co<sup>III</sup>L(OAc)] (3)**

| Exp. No. | T (°C) | [O <sub>2</sub> ] <sub>0</sub> (10 <sup>-3</sup> M) | [flaH] <sub>0</sub> (10 <sup>-4</sup> M) | [Co <sup>III</sup> L(OAc)] <sub>0</sub> (10 <sup>-6</sup> M) | $\nu_{in}$ (10 <sup>-7</sup> M s <sup>-1</sup> ) | $k$ (10 <sup>5</sup> M <sup>-2</sup> s <sup>-1</sup> ) | $k$ (10 <sup>5</sup> M <sup>-2</sup> s <sup>-1</sup> ) |
|----------|--------|-----------------------------------------------------|------------------------------------------|--------------------------------------------------------------|--------------------------------------------------|--------------------------------------------------------|--------------------------------------------------------|
| 1        | 70     | 4.02                                                | 1.05                                     | 2.00                                                         | 4.94                                             | 5.85 ± 0.11                                            |                                                        |
| 2        | 70     | 4.02                                                | 1.05                                     | 1.50                                                         | 3.64                                             | 5.75 ± 0.06                                            |                                                        |
| 3        | 70     | 4.02                                                | 1.07                                     | 1.00                                                         | 2.49                                             | 5.79 ± 0.09                                            |                                                        |
| 4        | 70     | 4.02                                                | 1.03                                     | 0.50                                                         | 1.17                                             | 5.65 ± 0.04                                            |                                                        |
| 5        | 70     | 4.02                                                | 0.90                                     | 0.50                                                         | 1.06                                             | 5.86 ± 0.11                                            | 5.79 ± 0.08                                            |
| 6        | 70     | 4.02                                                | 1.32                                     | 0.50                                                         | 1.55                                             | 5.84 ± 0.07                                            |                                                        |
| 7        | 55     | 5.23                                                | 0.96                                     | 1.00                                                         | 1.59                                             | 3.17 ± 0.10                                            |                                                        |
| 8        | 55     | 6.12                                                | 0.94                                     | 1.00                                                         | 1.96                                             | 3.40 ± 0.07                                            |                                                        |
| 9        | 55     | 4.34                                                | 0.95                                     | 1.00                                                         | 1.39                                             | 3.38 ± 0.04                                            |                                                        |
| 10       | 60     | 4.24                                                | 1.05                                     | 1.00                                                         | 1.83                                             | 4.11 ± 0.07                                            |                                                        |
| 11       | 65     | 4.13                                                | 1.08                                     | 1.00                                                         | 2.16                                             | 4.84 ± 0.07                                            |                                                        |

**[Ni<sup>III</sup>L(OAc)] (4)**

| Exp. No. | T (°C) | [O <sub>2</sub> ] <sub>0</sub> (10 <sup>-3</sup> M) | [flaH] <sub>0</sub> (10 <sup>-4</sup> M) | [Ni <sup>III</sup> L(OAc)] <sub>0</sub> (10 <sup>-6</sup> M) | $\nu_{in}$ (10 <sup>-8</sup> M s <sup>-1</sup> ) | $k$ (10 <sup>5</sup> M <sup>-2</sup> s <sup>-1</sup> ) | $k$ (10 <sup>5</sup> M <sup>-2</sup> s <sup>-1</sup> ) |
|----------|--------|-----------------------------------------------------|------------------------------------------|--------------------------------------------------------------|--------------------------------------------------|--------------------------------------------------------|--------------------------------------------------------|
| 1        | 70     | 4.02                                                | 1.03                                     | 2.00                                                         | 8.36                                             | 1.00 ± 0.07                                            |                                                        |
| 2        | 70     | 4.02                                                | 1.02                                     | 1.50                                                         | 5.67                                             | 0.92 ± 0.09                                            |                                                        |
| 3        | 70     | 4.02                                                | 1.07                                     | 1.00                                                         | 4.11                                             | 0.98 ± 0.04                                            |                                                        |
| 4        | 70     | 4.02                                                | 0.96                                     | 0.50                                                         | 1.69                                             | 0.88 ± 0.07                                            |                                                        |
| 5        | 70     | 4.02                                                | 0.82                                     | 1.00                                                         | 3.10                                             | 0.94 ± 0.09                                            | 0.95 ± 0.07                                            |
| 6        | 70     | 4.02                                                | 1.34                                     | 1.00                                                         | 5.84                                             | 1.08 ± 0.11                                            |                                                        |
| 7        | 70     | 4.87                                                | 1.05                                     | 1.00                                                         | 4.77                                             | 0.93 ± 0.10                                            |                                                        |
| 8        | 70     | 5.72                                                | 1.05                                     | 1.00                                                         | 5.33                                             | 0.88 ± 0.05                                            |                                                        |
| 9        | 75     | 3.90                                                | 1.01                                     | 1.00                                                         | 4.45                                             | 1.13 ± 0.07                                            |                                                        |
| 10       | 80     | 3.79                                                | 1.00                                     | 1.00                                                         | 5.23                                             | 1.38 ± 0.05                                            |                                                        |
| 11       | 90     | 3.49                                                | 1.04                                     | 1.00                                                         | 7.26                                             | 2.00 ± 0.09                                            |                                                        |

**[Cu<sup>II</sup>L(OAc)] (5)**

| Exp. No. | T (°C) | [O <sub>2</sub> ] <sub>0</sub> (10 <sup>-3</sup> M) | [flaH] <sub>0</sub> (10 <sup>-4</sup> M) | [Cu <sup>II</sup> L(OAc)] <sub>0</sub> (10 <sup>-6</sup> M) | $v_{in}$ (10 <sup>-8</sup> M s <sup>-1</sup> ) | $k$ (10 <sup>4</sup> M <sup>-2</sup> s <sup>-1</sup> ) | $k$ (10 <sup>4</sup> M <sup>-2</sup> s <sup>-1</sup> ) |
|----------|--------|-----------------------------------------------------|------------------------------------------|-------------------------------------------------------------|------------------------------------------------|--------------------------------------------------------|--------------------------------------------------------|
| 1        | 100    | 3.18                                                | 1.05                                     | 2.00                                                        | 0.91                                           | 1.37 ± 0.07                                            |                                                        |
| 2        | 100    | 3.18                                                | 1.00                                     | 3.00                                                        | 1.28                                           | 1.34 ± 0.11                                            |                                                        |
| 3        | 100    | 3.18                                                | 1.04                                     | 4.00                                                        | 1.81                                           | 1.37 ± 0.09                                            |                                                        |
| 4        | 100    | 3.18                                                | 1.02                                     | 5.00                                                        | 2.09                                           | 1.29 ± 0.05                                            |                                                        |
| 5        | 100    | 3.96                                                | 1.01                                     | 5.00                                                        | 2.80                                           | 1.40 ± 0.11                                            | 1.35 ± 0.12                                            |
| 6        | 100    | 4.75                                                | 1.00                                     | 5.00                                                        | 3.25                                           | 1.37 ± 0.12                                            |                                                        |
| 7        | 100    | 3.18                                                | 0.86                                     | 5.00                                                        | 1.83                                           | 1.33 ± 0.11                                            |                                                        |
| 8        | 100    | 3.18                                                | 1.21                                     | 5.00                                                        | 2.55                                           | 1.33 ± 0.09                                            |                                                        |
| 9        | 85     | 3.63                                                | 0.91                                     | 5.00                                                        | 1.20                                           | 0.73 ± 0.08                                            |                                                        |
| 10       | 90     | 3.49                                                | 0.90                                     | 5.00                                                        | 1.35                                           | 0.86 ± 0.11                                            |                                                        |
| 11       | 95     | 3.33                                                | 0.91                                     | 5.00                                                        | 1.65                                           | 1.09 ± 0.07                                            |                                                        |

**[Zn<sup>II</sup>L(OAc)] (6)**

| Exp. No. | T (°C) | [O <sub>2</sub> ] <sub>0</sub> (10 <sup>-3</sup> M) | [flaH] <sub>0</sub> (10 <sup>-4</sup> M) | [Zn <sup>II</sup> L(OAc)] <sub>0</sub> (10 <sup>-6</sup> M) | $v_{in}$ (10 <sup>-8</sup> M s <sup>-1</sup> ) | $k$ (10 <sup>4</sup> M <sup>-2</sup> s <sup>-1</sup> ) | $k$ (10 <sup>4</sup> M <sup>-2</sup> s <sup>-1</sup> ) |
|----------|--------|-----------------------------------------------------|------------------------------------------|-------------------------------------------------------------|------------------------------------------------|--------------------------------------------------------|--------------------------------------------------------|
| 1        | 100    | 3.18                                                | 0.80                                     | 2.00                                                        | 2.26                                           | 4.44 ± 0.02                                            |                                                        |
| 2        | 100    | 3.18                                                | 0.80                                     | 3.00                                                        | 3.30                                           | 4.45 ± 0.08                                            |                                                        |
| 3        | 100    | 3.18                                                | 0.79                                     | 4.00                                                        | 4.38                                           | 4.40 ± 0.06                                            |                                                        |
| 4        | 100    | 3.18                                                | 0.72                                     | 5.00                                                        | 5.47                                           | 4.78 ± 0.10                                            |                                                        |
| 5        | 100    | 3.18                                                | 0.90                                     | 5.00                                                        | 6.30                                           | 4.40 ± 0.10                                            | 4.52 ± 0.03                                            |
| 6        | 100    | 3.96                                                | 0.89                                     | 5.00                                                        | 7.80                                           | 4.43 ± 0.11                                            |                                                        |
| 7        | 100    | 4.75                                                | 0.87                                     | 5.00                                                        | 9.89                                           | 4.78 ± 0.15                                            |                                                        |
| 8        | 100    | 3.18                                                | 0.27                                     | 5.00                                                        | 1.97                                           | 4.58 ± 0.09                                            |                                                        |
| 9        | 100    | 3.18                                                | 0.55                                     | 5.00                                                        | 4.13                                           | 4.56 ± 0.07                                            |                                                        |
| 10       | 100    | 3.18                                                | 0.65                                     | 5.00                                                        | 4.58                                           | 4.43 ± 0.10                                            |                                                        |
| 11       | 100    | 3.18                                                | 0.93                                     | 5.00                                                        | 6.27                                           | 4.24 ± 0.10                                            |                                                        |
| 12       | 85     | 3.63                                                | 0.80                                     | 5.00                                                        | 3.73                                           | 2.57 ± 0.10                                            |                                                        |
| 13       | 90     | 3.49                                                | 0.80                                     | 5.00                                                        | 4.20                                           | 3.01 ± 0.07                                            |                                                        |
| 14       | 95     | 3.33                                                | 0.80                                     | 5.00                                                        | 4.92                                           | 3.69 ± 0.08                                            |                                                        |

**$[(\text{Fe}^{\text{III}}\text{L})_2(\mu\text{-O})(\mu\text{-OAc})]\text{Cl}$  (2B)**

| Exp. No. | T (°C) | $[\text{O}_2]_0$<br>( $10^{-3}$ M) | $[\text{flaH}]_0$<br>( $10^{-4}$ M) | $[[(\text{Fe}^{\text{III}}\text{L})_2(\mu\text{-O})(\mu\text{-OAc})]\text{Cl}]_0$<br>( $10^{-6}$ M) | $v_{\text{in}}$<br>( $10^{-9}$ M s $^{-1}$ ) |
|----------|--------|------------------------------------|-------------------------------------|-----------------------------------------------------------------------------------------------------|----------------------------------------------|
| 1        | 70     | 4.02                               | 0.90                                | 0.50                                                                                                | 0.43                                         |
| 2        | 70     | 4.02                               | 0.93                                | 1.00                                                                                                | 0.85                                         |
| 3        | 70     | 4.02                               | 0.91                                | 1.50                                                                                                | 1.14                                         |
| 4        | 70     | 4.02                               | 0.92                                | 2.00                                                                                                | 1.62                                         |
| 5        | 100    | 3.18                               | 1.01                                | 0.50                                                                                                | 6.37                                         |
| 6        | 100    | 3.18                               | 0.96                                | 1.00                                                                                                | 12.4                                         |
| 7        | 100    | 3.18                               | 0.97                                | 1.50                                                                                                | 18.5                                         |
| 8        | 100    | 3.18                               | 0.97                                | 2.00                                                                                                | 24.7                                         |

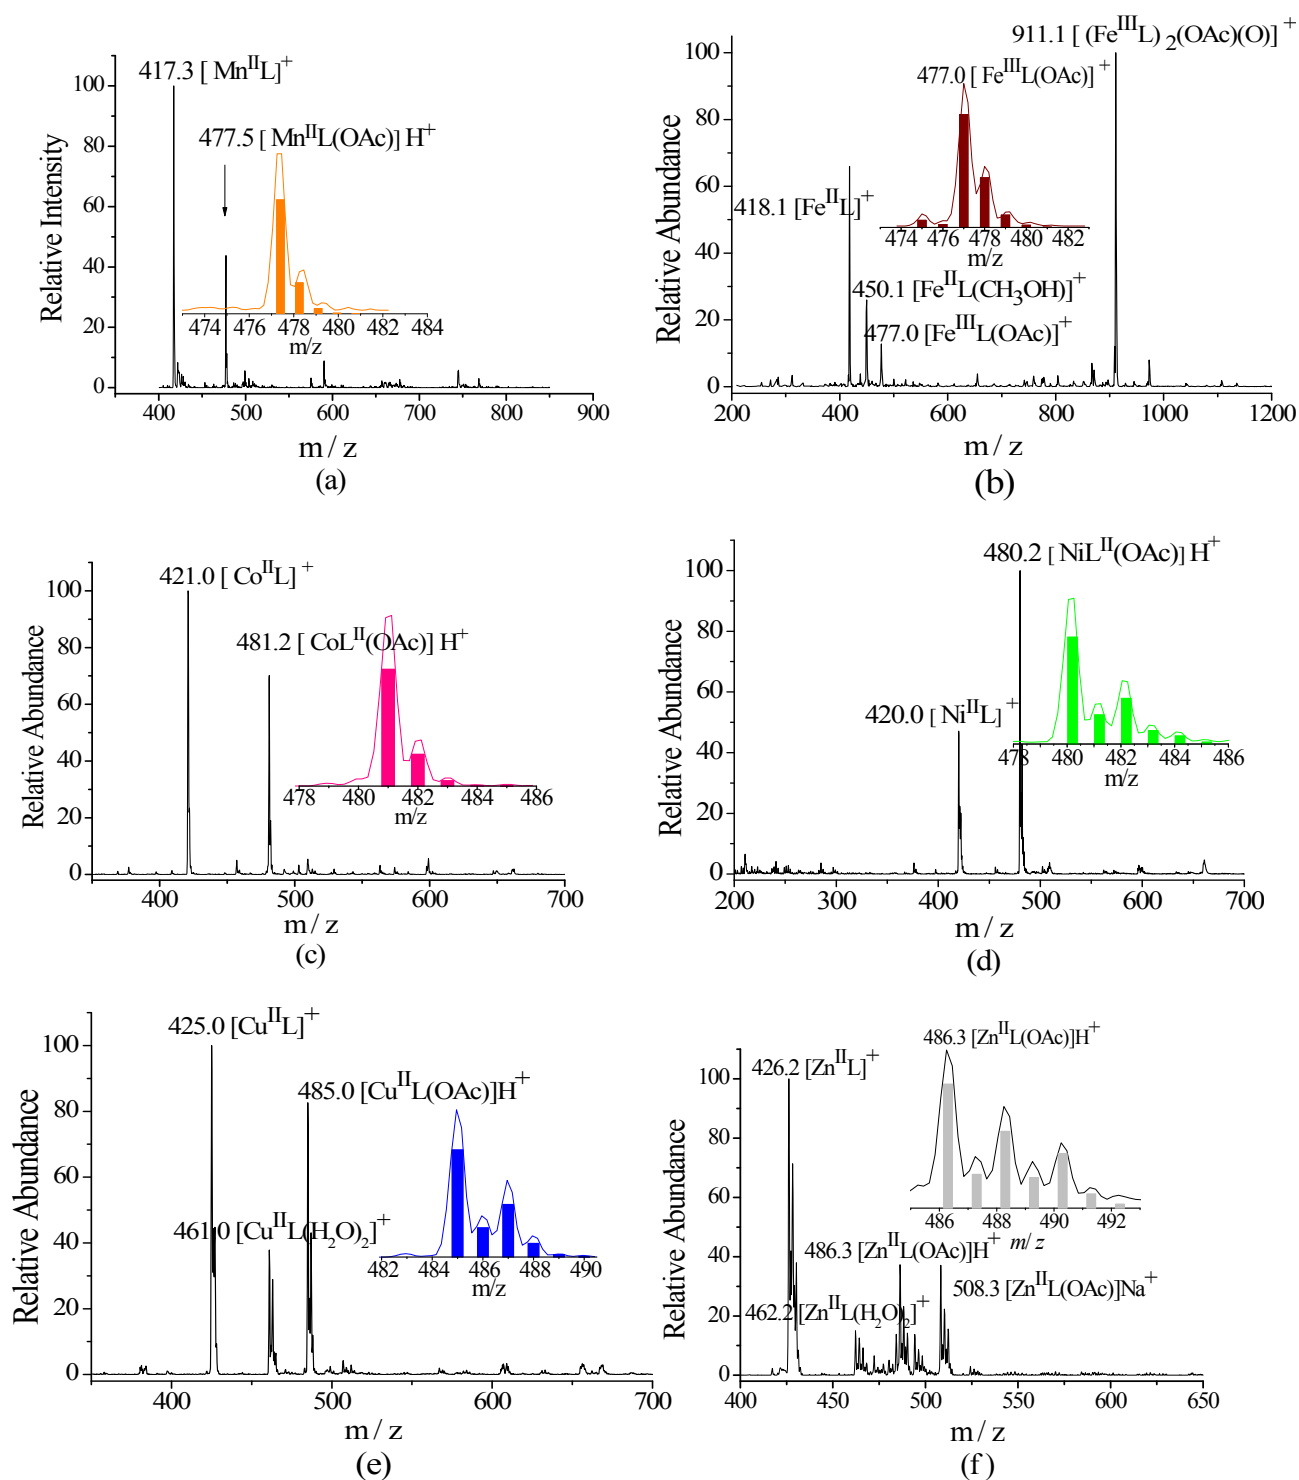

**Figure S1.** ESI-MS spectra of the complexes. Insert: The molecular peak cluster of  $[M^{II}L(OAc)]H^+$  (M: Mn, Co, Ni, Cu) or  $[Fe^{III}L(OAc)]^+$  (Line: experiment, column: calculated). (a)  $[Mn^{II}L(OAc)]$  (**1**), (b)  $[Fe^{III}L(OAc)]$  (**2**), (c)  $[Co^{II}L(OAc)]$  (**3**), (d)  $[Ni^{II}L(OAc)]$  (**4**), (e)  $[Cu^{II}L(OAc)]$  (**5**), (f)  $[Zn^{II}L(OAc)]$  (**6**).

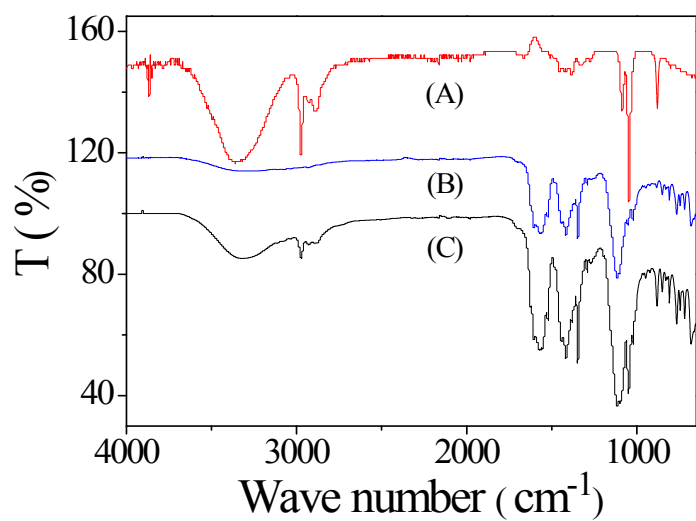

**Figure S2.** The FT-IR spectra of the ethanol solution and solid sample of  $[\text{Ni}^{\text{II}}\text{L}(\text{OAc})]$  (**4**). (A) solvent ethanol (B) solid sample of  $[\text{Ni}^{\text{II}}\text{L}(\text{OAc})]$  (C) ethanol solution of  $[\text{Ni}^{\text{II}}\text{L}(\text{OAc})]$ .

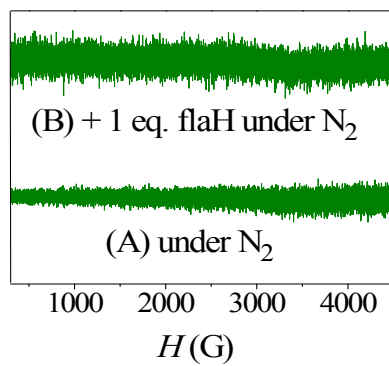

**Figure S3.** The EPR spectra of [Co<sup>II</sup>L(OAc)] (**3**) (4 mM in 0.5 mL DMF) at 100 K. A: under N<sub>2</sub>, B: in the presence of 1 eq. flaH under N<sub>2</sub>.

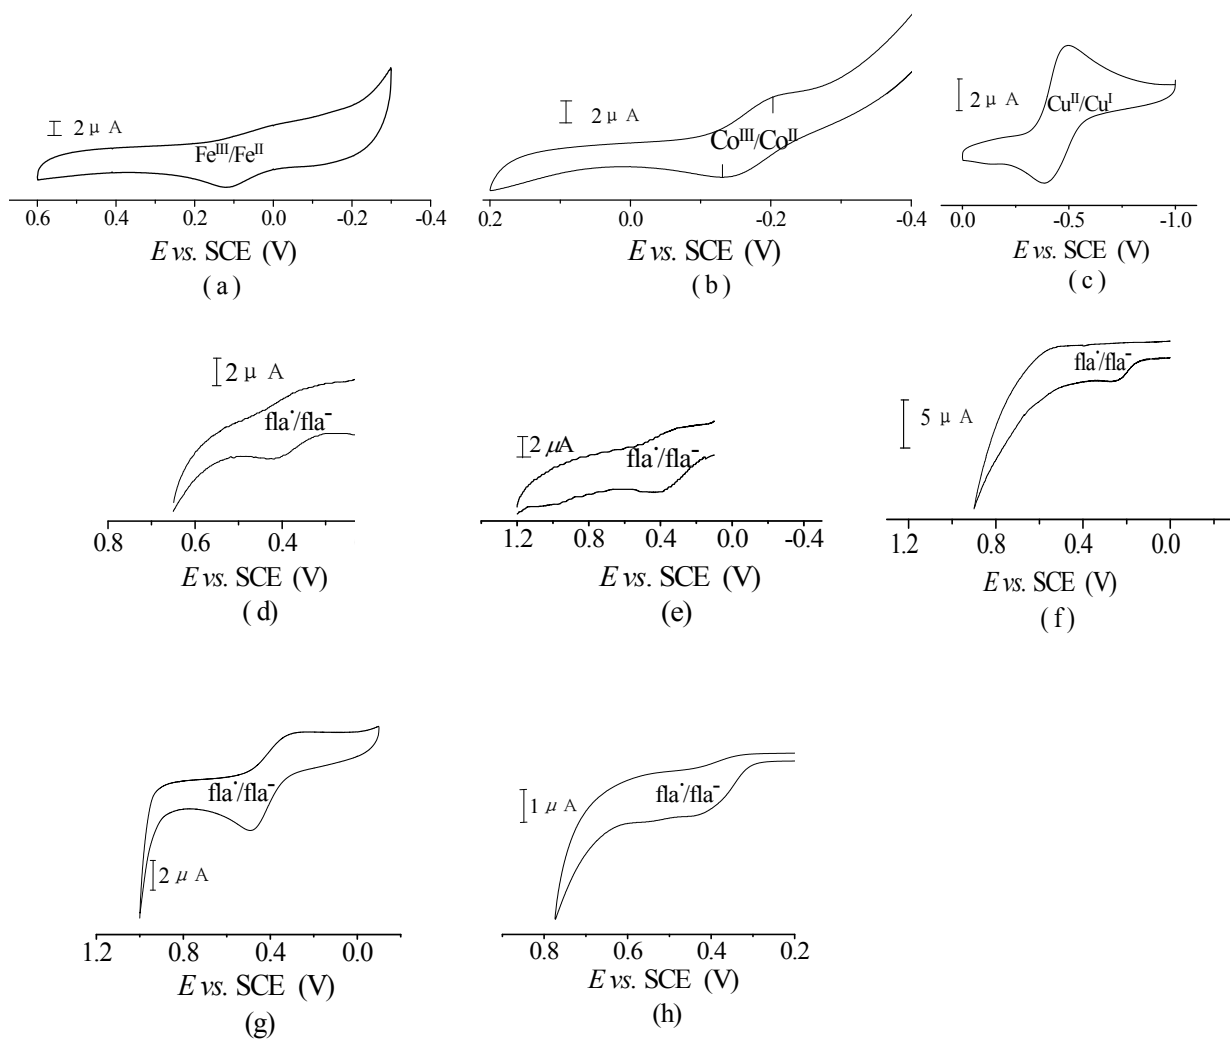

**Figure S4.** Cyclic voltammograms of (a)  $[\text{Fe}^{\text{II}}\text{L}(\text{OAc})]$  (**2**), (b)  $[\text{Co}^{\text{II}}\text{L}(\text{OAc})]$  (**3**), (c)  $[\text{Cu}^{\text{II}}\text{L}(\text{OAc})]$  (**5**) and flavonol in the presence of 1 eq. (d)  $[\text{Mn}^{\text{II}}\text{L}(\text{OAc})]$  (**1**), (e)  $[\text{Co}^{\text{II}}\text{L}(\text{OAc})]$  (**3**), (f)  $[\text{Ni}^{\text{II}}\text{L}(\text{OAc})]$  (**4**), (g)  $[\text{Cu}^{\text{II}}\text{L}(\text{OAc})]$  (**5**) and (h)  $[\text{Zn}^{\text{II}}\text{L}(\text{OAc})]$  (**6**) in DMF.



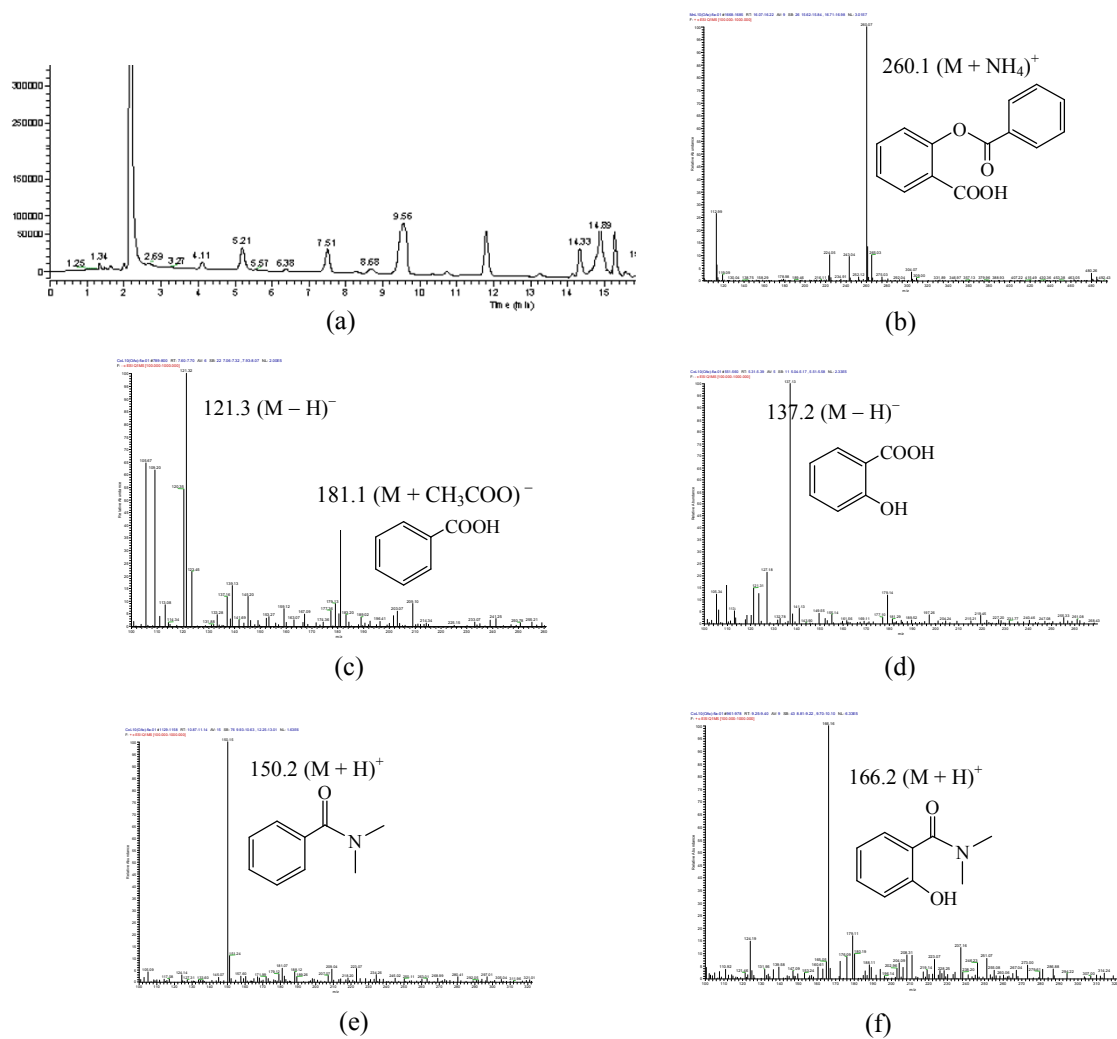

**Figure S5.** The HPLC-MS spectra of the reaction products of dioxygenation of flavonol catalyzed by  $[\text{Co}^{\text{II}}\text{L}(\text{OAc})]$  (**3**) at  $70^\circ\text{C}$  for 12 hrs. (a) HPLC spectra. MS spectra of (b) HObs  $m/z$  (pos.):  $260.1 (\text{M} + \text{NH}_4)^+$ , (c) benzoic acid  $m/z$  (neg.):  $121.3 (\text{M} - \text{H})^-$ ,  $181.1 (\text{M} + \text{CH}_3\text{COO})^-$ , (d) salicylic acid  $m/z$  (neg.):  $137.2 (\text{M} - \text{H})^-$ , (e) *N,N*-dimethylbenzamide  $m/z$  (pos.):  $150.2 (\text{M} + \text{H})^+$  and (f) 2-hydroxy-*N,N*-dimethylbenzamide  $m/z$  (pos.):  $166.2 (\text{M} + \text{H})^+$ .

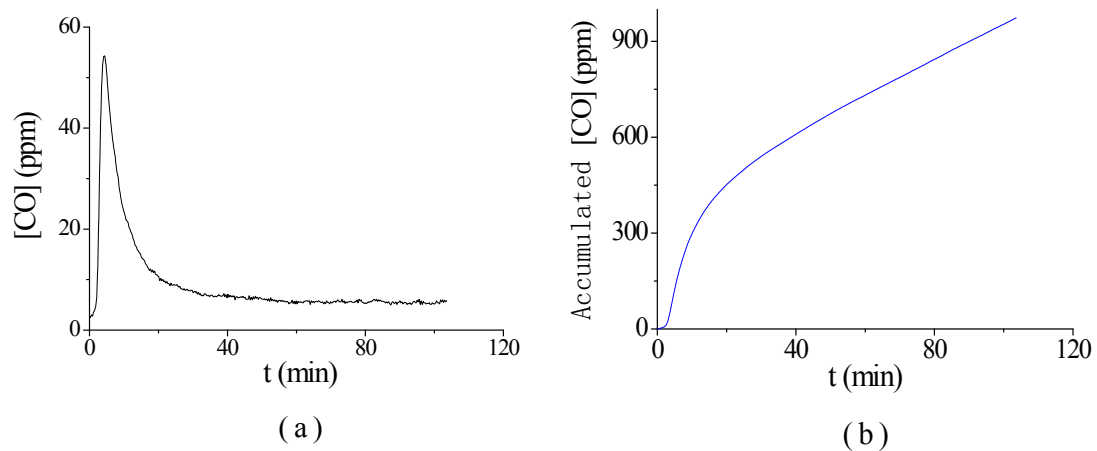

**Figure S6.** Detection of the production of CO during dioxxygenation reaction of flavonol catalyzed by  $[\text{Co}^{\text{II}}\text{L}(\text{OAc})]$  (**3**) at 70 °C. (a) Plot of the CO concentration vs. reaction time. (b) Plot of the integrated CO concentration vs. reaction time.

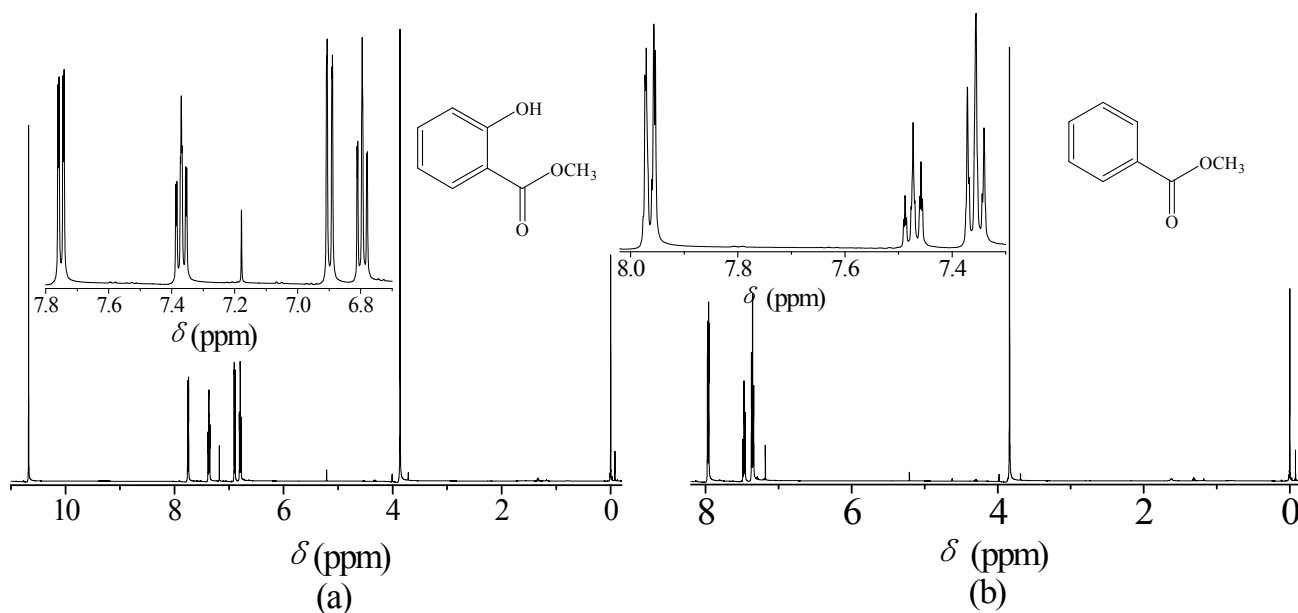

**Figure S7.**  $^1\text{H}$  NMR spectra of two main products of reaction of flavonol ( $2.5 \times 10^{-2}$  M in 200 mL DMF) with  $\text{O}_2$  catalyzed by  $[\text{Co}^{\text{II}}\text{L}(\text{OAc})]$  (**3**) (5% mol) at  $100\text{ }^\circ\text{C}$  for 7 days after esterification by  $\text{CH}_3\text{OH}$  in the presence of  $\text{H}_2\text{SO}_4$  at ambient temperature. (a) salicylic acid methyl ester (b) benzoic acid methyl ester.

Note: The  $^1\text{H}$  NMR ( $\text{CDCl}_3$ , 400 MHz) data of salicylic acid methyl ester and benzoic acid methyl ester. There are some solvent peaks in spectra.

**Salicylic acid methyl ester:**  $\delta$ (ppm) 3.86 (s, 3 H,  $-\text{COOCH}_3$ ), 6.80 (t,  $J = 7.5$  Hz, 1 H,  $\text{H}_{\text{Ph-5}}$ ), 6.90 (d,  $J = 10$  Hz, 1 H,  $\text{H}_{\text{Ph-3}}$ ), 7.37 (t,  $J = 7.5$  Hz, 1 H,  $\text{H}_{\text{Ph-4}}$ ), 7.75 (d,  $J = 7.5$  Hz, 1 H,  $\text{H}_{\text{Ph-6}}$ ), 10.68 (s, 1H,  $-\text{OH}$ ).

**Benzoic acid methyl ester:**  $\delta$ (ppm) 3.84 (s, 3 H,  $-\text{COOCH}_3$ ), 7.36 (t,  $J = 7.5$  Hz, 1 H,  $\text{H}_{\text{Ph-4}}$ ), 7.47 (t,  $J = 7.5$  Hz, 2 H,  $\text{H}_{\text{Ph-3}}$ ,  $\text{H}_{\text{Ph-5}}$ ), 7.96 (d,  $J = 7.5$  Hz, 2 H,  $\text{H}_{\text{Ph-2}}$ ,  $\text{H}_{\text{Ph-6}}$ ).

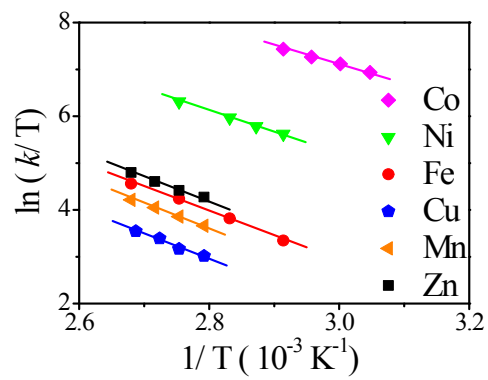

**Figure S8.** Eyring plot for the dioxygenation of flavonol catalyzed by the complexes  $[\text{M}^{\text{II}}\text{L}(\text{OAc})]$  in DMF.

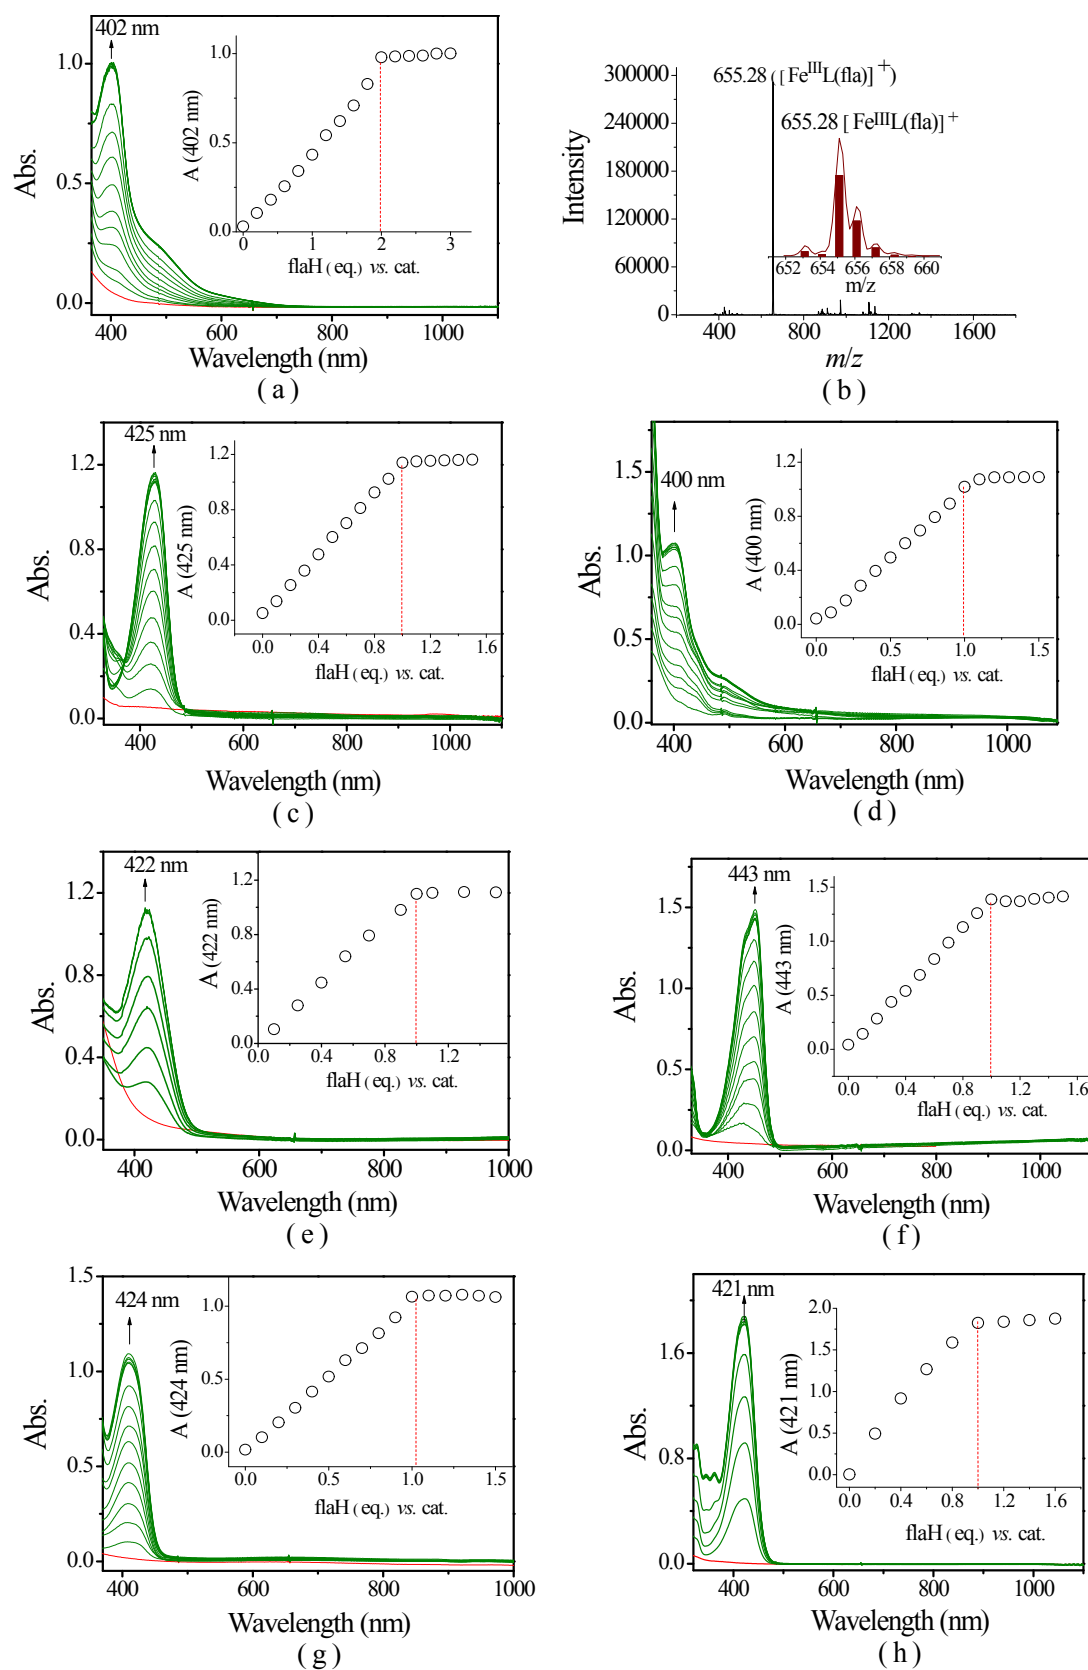

**Figure S9.** Spectral changes accompanying the titration of the complex (a) **2B**, (c) **1**, (d) **2**, (e) **3**, (f) **4**, (g) **5** and (h) **6** ( $1.0 \times 10^{-4}$  M except **2B**  $0.5 \times 10^{-4}$  M) by flavonol under  $\text{N}_2$ . Inset: Absorbance changes at  $\lambda_{\max}$  vs. eq. of flaH, (b) ESI-MS spectrum of the titration solution of **2B**.

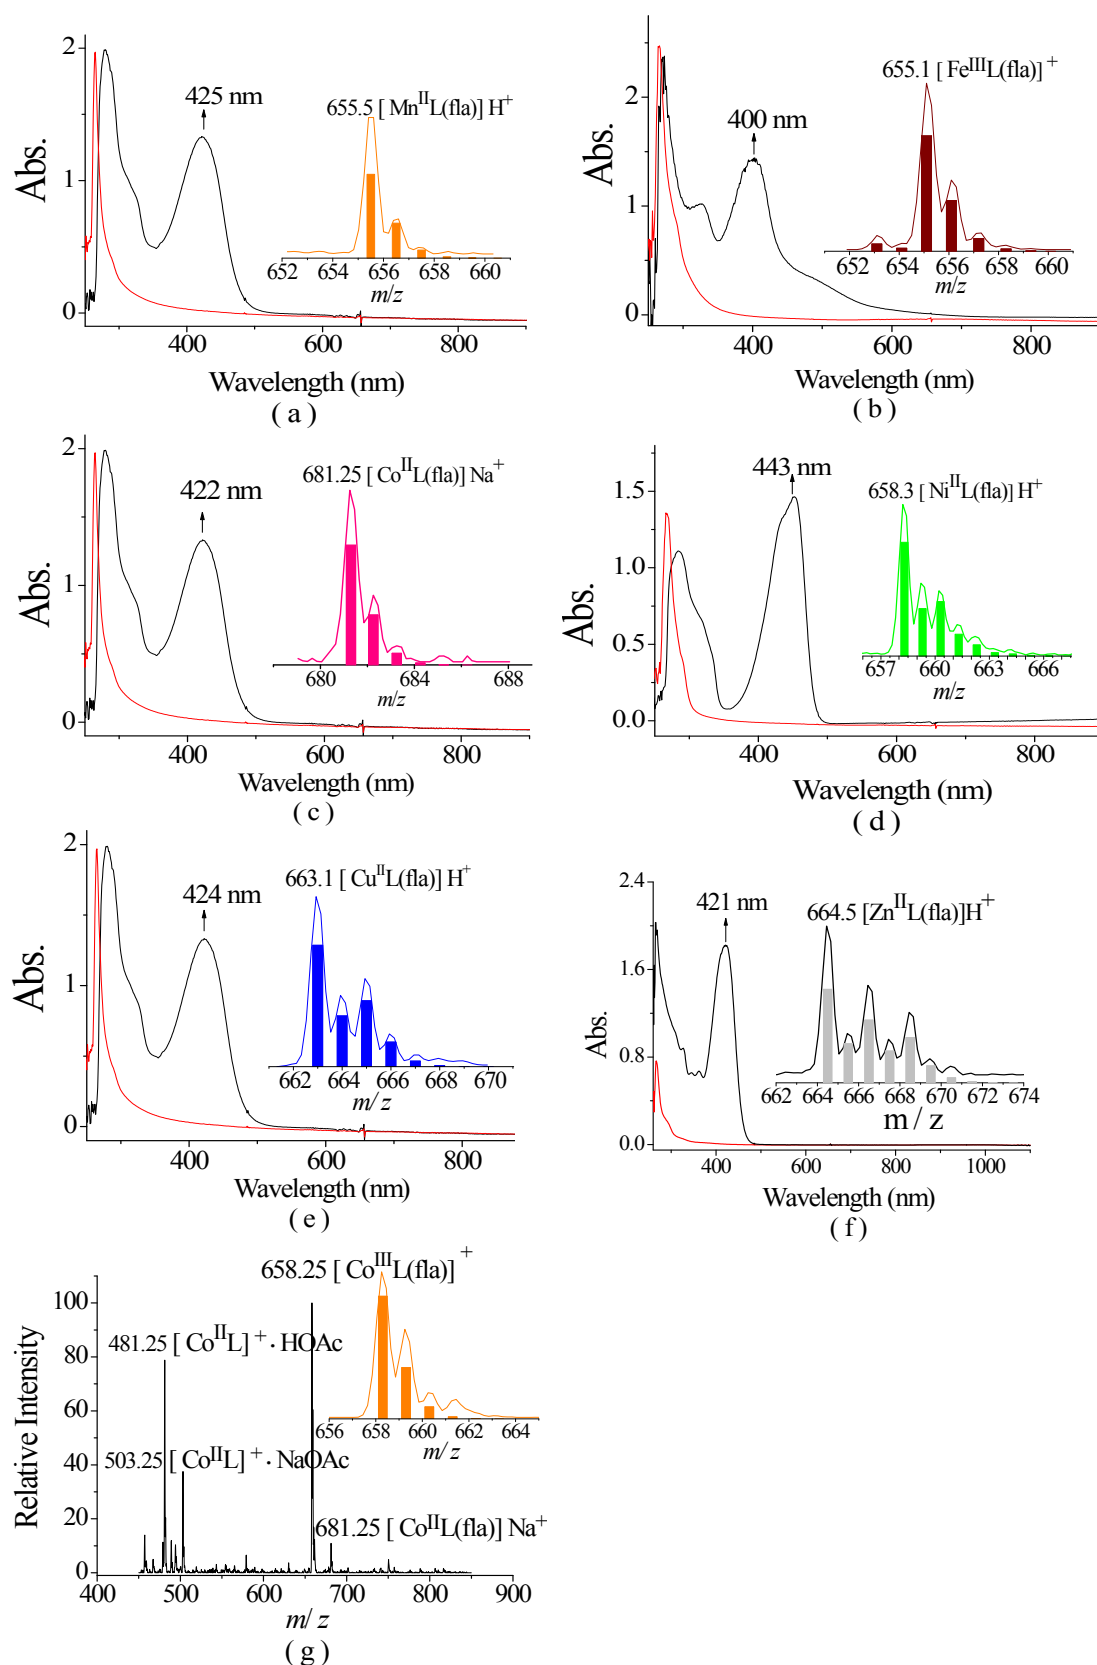

**Figure S10.** The UV-vis spectra of the complexes  $[\text{M}^{\text{II}}\text{L}(\text{OAc})]$  (0.1 mM) (red) and in the presence of equivalent amount of flavonol (black) (a)  $[\text{Mn}^{\text{II}}\text{L}(\text{OAc})]$  (**1**), (b)  $[\text{Fe}^{\text{II}}\text{L}(\text{OAc})]$  (**2**), (c)  $[\text{Co}^{\text{II}}\text{L}(\text{OAc})]$  (**3**), (d)  $[\text{Ni}^{\text{II}}\text{L}(\text{OAc})]$  (**4**), (e)  $[\text{Cu}^{\text{II}}\text{L}(\text{OAc})]$  (**5**), (f)  $[\text{Zn}^{\text{II}}\text{L}(\text{OAc})]$  (**6**) (g) ESI-MS spectrum of the solution of  $[\text{Co}^{\text{II}}\text{L}(\text{OAc})] + 1 \text{ eq. flaH}$  after exposure to  $\text{O}_2$ . Inset: The peak cluster of  $[\text{M}^{\text{II}}\text{L}(\text{fla})]\text{H}^+$  (M: Mn, Ni, Cu) or  $[\text{M}^{\text{III}}\text{L}(\text{fla})]^+$  (M: Fe, Co) (Line: experiment, column: calculated).
